# Supplementary material for: Needs for mobile and internet-based psychological intervention in patients with self-injury and suicide-related behaviors: a qualitative systematic review
Source: Springer Nature journal article supplement (doi:10.1186/s12888-023-05477-2), 2024-01-04

Additional file 3: One of the themes of qualitative synthesis: Needs in the perception link

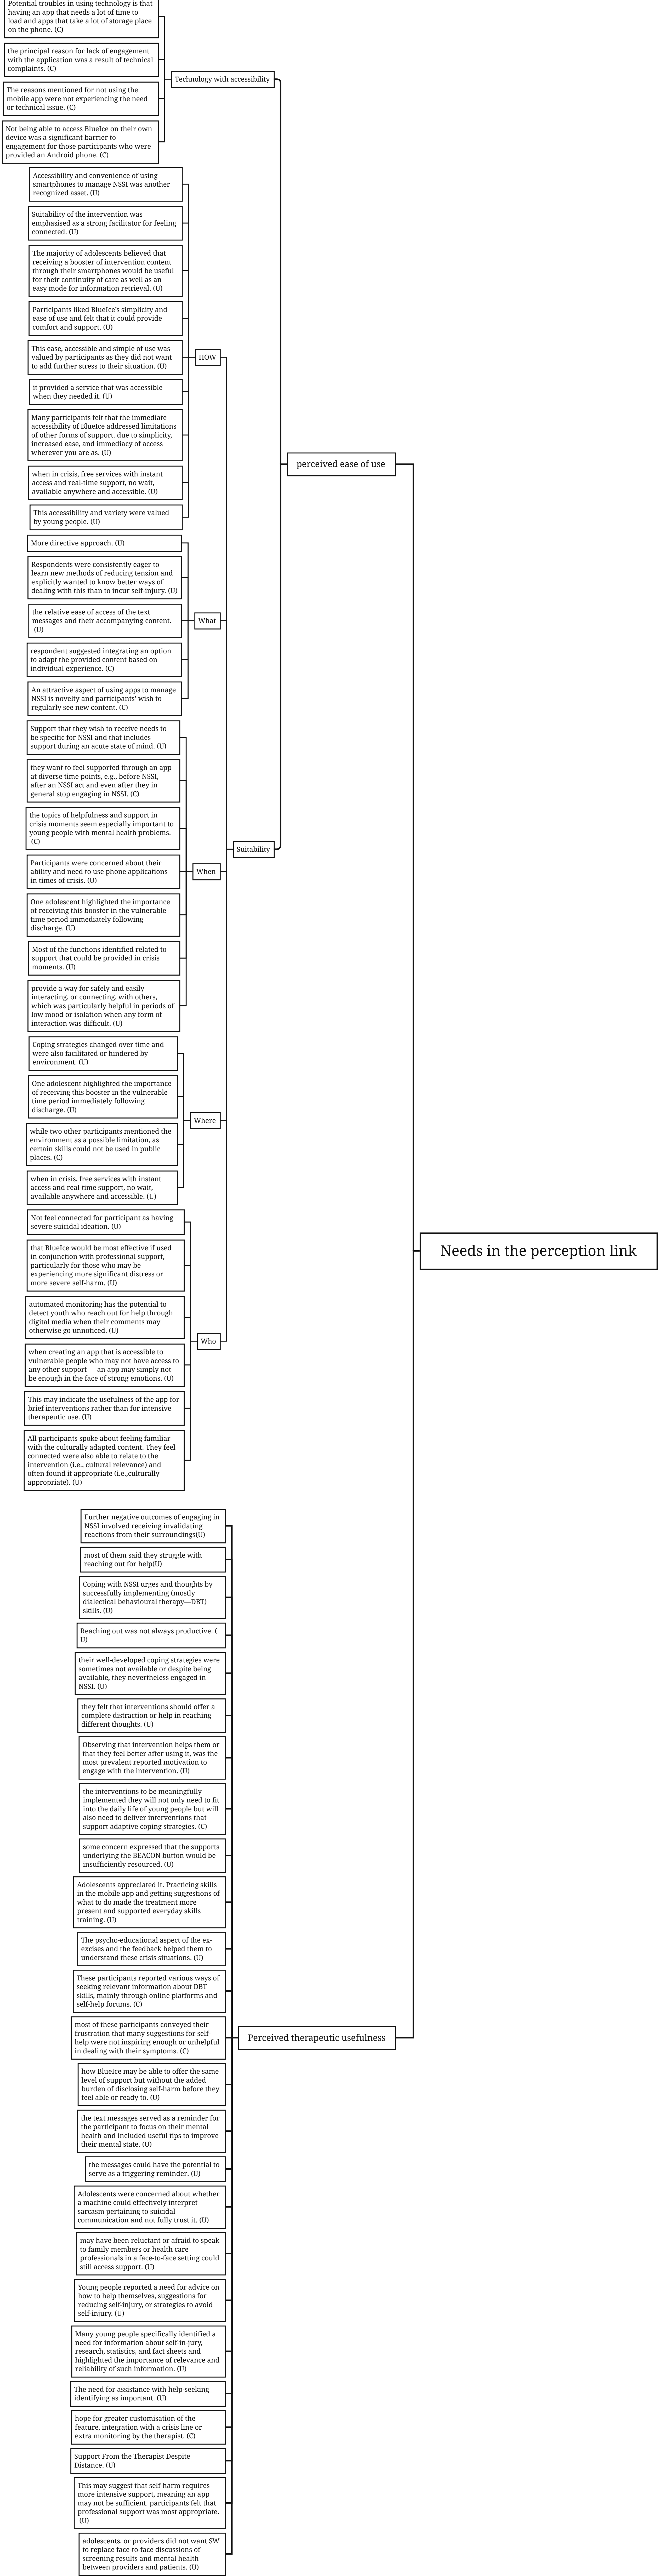

Supplement: MOESM3 [file 12888_2023_5477_MOESM3_ESM.pdf]
